# Supplementary material
Source: MDPI journal article supplement (https://www.mdpi.com/2073-4433/13/11/1931)
Supplement: s1 [file s1]

## Supplementary Materials:

Yudong Li <sup>1,2</sup>, Yue Li <sup>1</sup>, Yougui Song <sup>1,\*</sup>, Haoru Wei <sup>1,2</sup>, Yanping Wang <sup>1,2</sup> and Nosir Shukurov <sup>3</sup>

**Table S1.** Table S1 Clay mineral contents in the ZSP section

| Age (ka) | Smectite(%) | Illite(%) | Chlorite (%) | Kaolinite (%) |
|----------|-------------|-----------|--------------|---------------|
| 2.422    | 1.169       | 62.928    | 26.907       | 8.995         |
| 3.229    | 2.072       | 62.237    | 27.115       | 8.575         |
| 4.036    | 5.729       | 65.851    | 20.340       | 8.079         |
| 4.844    | 5.241       | 61.777    | 23.315       | 9.668         |
| 5.651    | 5.375       | 77.755    | 12.404       | 4.465         |
| 6.458    | 4.923       | 57.884    | 24.972       | 12.221        |
| 7.265    | 3.891       | 58.979    | 26.493       | 10.637        |
| 8.073    | 2.936       | 58.084    | 28.673       | 10.307        |
| 8.880    | 3.849       | 59.774    | 26.563       | 9.814         |
| 9.687    | 3.368       | 59.681    | 25.756       | 11.195        |
| 10.494   | 3.943       | 59.446    | 26.368       | 10.243        |
| 11.323   | 2.517       | 62.374    | 24.698       | 10.411        |
| 12.169   | 2.831       | 64.854    | 25.185       | 7.130         |
| 12.976   | 1.241       | 62.206    | 27.749       | 8.804         |
| 13.784   | 1.375       | 66.913    | 23.128       | 8.585         |
| 14.640   | 2.386       | 64.658    | 24.043       | 8.914         |
| 15.429   | 2.247       | 67.998    | 21.621       | 8.134         |
| 16.270   | 4.933       | 65.523    | 18.549       | 10.995        |
| 17.112   | 2.968       | 63.684    | 23.099       | 10.249        |
| 17.716   | 0.000       | 64.141    | 26.188       | 9.672         |
| 18.293   | 2.477       | 62.860    | 24.530       | 10.133        |
| 18.892   | 1.585       | 62.566    | 25.877       | 9.972         |
| 19.466   | 1.589       | 65.061    | 24.430       | 8.920         |
| 20.042   | 1.639       | 62.638    | 25.273       | 10.449        |
| 20.631   | 0.812       | 64.169    | 25.507       | 9.512         |
| 21.219   | 0.000       | 66.952    | 24.158       | 8.890         |
| 21.798   | 0.000       | 65.764    | 26.368       | 7.868         |
| 22.403   | 0.000       | 84.367    | 11.230       | 4.403         |
| 22.958   | 0.000       | 65.082    | 25.725       | 9.193         |
| 23.527   | 0.000       | 61.755    | 27.455       | 10.791        |
| 24.070   | 1.252       | 62.227    | 24.930       | 11.591        |
| 24.611   | 0.000       | 64.598    | 25.648       | 9.754         |
| 25.155   | 0.000       | 65.164    | 26.110       | 8.726         |
| 25.704   | 1.544       | 63.629    | 25.824       | 9.003         |

**Table S2.** Calibrated lightness ( $\Delta L^*$ ) in the ZSP section.

| Age (ka) | $\Delta L^*$ |
|----------|--------------|
| 0        | 0.40296      |
| 0.40363  | -1.90887     |
| 0.80725  | -2.30226     |
| 1.21088  | -2.66372     |
| 1.6145   | 0.16591      |
| 2.01813  | -1.77251     |
| 2.42175  | -2.00535     |
| 2.82538  | -0.94666     |
| 3.229    | -1.66653     |
| 3.63263  | -2.19484     |
| 4.03625  | -1.44187     |
| 4.43988  | -0.43147     |
| 4.8435   | -1.79031     |
| 5.24713  | -1.88879     |
| 5.65075  | -1.33982     |
| 6.05438  | -1.30398     |
| 6.458    | -1.63067     |
| 6.86163  | 0.14432      |
| 7.26525  | 0.66934      |
| 7.66888  | 0.4765       |
| 8.0725   | 1.45511      |
| 8.47613  | 0.76706      |
| 8.87975  | 0.09779      |
| 9.28338  | 0.61376      |
| 9.687    | 0.32335      |
| 10.076   | 0.50763      |
| 10.494   | 0.71332      |
| 10.904   | 1.07705      |
| 11.323   | 0.72395      |
| 11.748   | 0.52143      |
| 12.169   | 1.19455      |
| 12.575   | 0.568        |
| 12.976   | 0.32987      |
| 13.4     | 1.4257       |
| 13.784   | 0.24917      |
| 14.219   | -0.04479     |
| 14.64    | 0.67499      |
| 15.021   | -0.2261      |
| 15.429   | 1.94252      |
| 15.834   | 0.56683      |
| 16.27    | -0.50466     |
| 16.688   | 1.02546      |
| 17.112   | 0.47437      |
| 17.412   | 0.28498      |
| 17.716   | 1.294026216  |
| 18.004   | 0.94939      |
| 18.293   | 0.83171      |
| 18.6     | 0.9927       |
| 18.892   | 1.03492      |
| 19.177   | 0.89195      |
| 19.466   | 0.22223      |
| 19.754   | 0.69973      |

---

|        |          |
|--------|----------|
| 20.042 | 0.8439   |
| 20.339 | 0.05251  |
| 20.631 | -0.43559 |
| 20.931 | -0.12642 |
| 21.219 | 0.32119  |
| 21.507 | 0.17649  |
| 21.798 | -0.51146 |
| 22.104 | -0.03582 |
| 22.403 | -0.09595 |
| 22.677 | 0.11587  |
| 22.958 | -0.73012 |
| 23.243 | -1.27175 |
| 23.527 | 0.77104  |
| 23.798 | -1.25763 |
| 24.07  | 0.10147  |
| 24.338 | 0.10241  |
| 24.611 | -0.88609 |
| 24.883 | -0.28686 |
| 25.155 | -0.51612 |
| 25.427 | -0.26219 |
| 25.704 | 0.27607  |
| 25.974 | -0.04862 |

---
